# Supplementary material for: Health-Related Internet Use by Informal Caregivers of Children and Adolescents: An Integrative Literature Review
Source: PubMed Central journal article supplement (PMC4796403; doi:10.2196/jmir.4124), 2016-03-03
Supplement: jmir_v18i3e57_app1.pdf [file jmir_v18i3e57_app1.pdf]

**Table 1. Summary of characteristics of informal caregivers and care recipients from 17 studies**

| First author, Year    | Country      | Number of Participants | Characteristics of Children with Healthcare Needs                                      |                                                  | Characteristics of Their Informal Caregivers                                                                                                                                  |
|-----------------------|--------------|------------------------|----------------------------------------------------------------------------------------|--------------------------------------------------|-------------------------------------------------------------------------------------------------------------------------------------------------------------------------------|
|                       |              |                        | Age                                                                                    | Medical conditions                               |                                                                                                                                                                               |
| Zuckerman, 2014 [30]  | USA          | 458 (all completed)    | Range: Birth - 12yrs                                                                   | Receiving pediatric primary or urgent healthcare | <ul style="list-style-type: none"> <li>• Parents</li> <li>• Educated at least college=42%</li> <li>• Non-Hispanic Caucasian=62%</li> </ul>                                    |
| DeMartini, 2013 [26]  | USA          | 257 (all completed)    | Median = 2.9yrs                                                                        | Receiving pediatric primary healthcare           | <ul style="list-style-type: none"> <li>• Family to child</li> <li>• Medicaid insured=92%</li> <li>• Urban residents</li> </ul>                                                |
| Dudas, 2013 [27]      | USA          | 300 (229 completed)    | Range: Birth - 21yrs                                                                   | Receiving pediatric primary healthcare           | <ul style="list-style-type: none"> <li>• Parents: Mothers=79%</li> <li>• Caucasian=47%; AA=43%</li> <li>• Medicaid insured=38%</li> </ul>                                     |
| Naftel, 2013 [21]     | USA          | 300 (all completed)    | <ul style="list-style-type: none"> <li>• Range: 0 - 21yrs</li> <li>• Mean=8</li> </ul> | Shunted hydrocephalus                            | <ul style="list-style-type: none"> <li>• Parents or legal guardian</li> <li>• Caucasian=66%; AA=32%</li> <li>• Medicaid insured=56%</li> <li>• Rural residents=63%</li> </ul> |
| Nordfeldt, 2013 [24]  | Sweden       | 27 (all completed)     | Range: 10-17                                                                           | Type 1 Diabetes                                  | <ul style="list-style-type: none"> <li>• Parents: Mothers=63%</li> </ul>                                                                                                      |
| AlSaadi, 2012 [20]    | Saudi Arabia | 505                    | Range: Birth - 21yrs                                                                   | Asthma                                           | <ul style="list-style-type: none"> <li>• Parents</li> </ul>                                                                                                                   |
| Fagnano, 2012 [19]    | USA          | 304 (all completed)    | Range: 3 - 10yrs                                                                       | Persistent asthma                                | <ul style="list-style-type: none"> <li>• Family to child</li> <li>• Urban residents</li> </ul>                                                                                |
| Saidinejad, 2012 [32] | USA          | 509 (all completed)    | Mean=8.23 (SD=4.07)                                                                    | Receiving healthcare in                          | <ul style="list-style-type: none"> <li>• Family to child</li> </ul>                                                                                                           |

|                      |           |                                   |                      |                                                                       |                                                                                                                                                                   |
|----------------------|-----------|-----------------------------------|----------------------|-----------------------------------------------------------------------|-------------------------------------------------------------------------------------------------------------------------------------------------------------------|
|                      |           | d)                                | )                    | the ED                                                                | <ul style="list-style-type: none"> <li>• Caucasian=9%; AA=83%</li> <li>• Medicaid insured=78%</li> </ul>                                                          |
| Walsh, 2012 [29]     | Australia | 391(baseline) and 187 (follow-up) | Range: 0.5 - 10yrs   | General health concerns                                               | <ul style="list-style-type: none"> <li>• Parents: Mothers=95%</li> <li>• Not full-time employed=76%</li> </ul>                                                    |
| Knapp, 2011 [28]     | USA       | 4072 (2371 completed)             | Range: 1 - 21yrs     | Special healthcare needs                                              | <ul style="list-style-type: none"> <li>• Parents: Mothers=91%</li> <li>• English speaker=77%</li> </ul>                                                           |
| Gundersen, 2011 [22] | Norway    | 10 (all completed)                | Range: 1.5 -16yrs    | Rare genetic diseases                                                 | <ul style="list-style-type: none"> <li>• Parents</li> <li>• Educated at least high school=90%</li> </ul>                                                          |
| Nogueira, 2009 [23]  | Brazil    | 132 (all completed)               | Range: 2 - 14yrs     | Disease for ENT surgery                                               | <ul style="list-style-type: none"> <li>• Parents or legal guardian: Mothers=83%</li> <li>• Educated at least diploma=73%</li> </ul>                               |
| Bouche, 2008 [25]    | France    | 2197 (1068 completed)             | Range: 2 - 6yrs      | Various conditions including allergy, asthma, preterm baby care, etc. | <ul style="list-style-type: none"> <li>• Parents</li> <li>• Single parent family=13%</li> <li>• Educated at least high school=73%</li> </ul>                      |
| Porter, 2007 [17]    | Australia | 207 (166 completed)               | Range: Birth - 21yrs | Permanent hearing loss                                                | <ul style="list-style-type: none"> <li>• Parents or legal guardian: Mothers=89%</li> <li>• Educated at least high school=85%</li> <li>• Unemployed=36%</li> </ul> |
| Goldman, 2006 [31]   | Canada    | 1025 (950 completed)              | Range: 1 - 21yrs     | Receiving ED care in urban hospitals                                  | Parents                                                                                                                                                           |
| Massin, 2006 [18]    | Belgium   | 509 (389 completed)               | Range: 3mos - 17yrs  | Congenital heart disease                                              | Parents                                                                                                                                                           |

|                         |    |                            |                     |            |                                                                                                                                    |
|-------------------------|----|----------------------------|---------------------|------------|------------------------------------------------------------------------------------------------------------------------------------|
| Blackburn,<br>2005 [33] | UK | 788 (all<br>complete<br>d) | Range: 0 -<br>17yrs | Disability | <ul style="list-style-type: none"> <li>• Parents: Mothers=93%</li> <li>• Caucasian=96%; AA=4%</li> <li>• Unemployed=56%</li> </ul> |
|-------------------------|----|----------------------------|---------------------|------------|------------------------------------------------------------------------------------------------------------------------------------|

Notes for abbreviations: USA=United States of America; UK=United Kingdom; Yrs=Years; Mos=Months; SD=Standard deviation; ED=Emergency department; ENT=Ear, nose, and throat; AA=African American
