# Supplementary material for: Health-Related Internet Use by Informal Caregivers of Children and Adolescents: An Integrative Literature Review
Source: PubMed Central journal article supplement (PMC4796403; doi:10.2196/jmir.4124), 2016-03-03
Supplement: jmir_v18i3e57_app2.pdf [file jmir_v18i3e57_app2.pdf]

**Table 2. Summary of prevalence and characteristics of health-related Internet use**

| First author, Year   | General Internet use |                                                                                                                                                                                                  | General health-related Internet use                    |            | Within health-related Internet use group                                                             |                                                                                                                                                                                                                                                                                                                                                                                                                                                |
|----------------------|----------------------|--------------------------------------------------------------------------------------------------------------------------------------------------------------------------------------------------|--------------------------------------------------------|------------|------------------------------------------------------------------------------------------------------|------------------------------------------------------------------------------------------------------------------------------------------------------------------------------------------------------------------------------------------------------------------------------------------------------------------------------------------------------------------------------------------------------------------------------------------------|
|                      | Prevalence           | Characteristics                                                                                                                                                                                  | Definition                                             | Prevalence | Purpose                                                                                              | Characteristics                                                                                                                                                                                                                                                                                                                                                                                                                                |
| Zuckerman, 2014 [30] | 73%                  | <ul style="list-style-type: none"> <li>• 87.3% accessed at home</li> <li>• 73% =Daily email users</li> </ul>                                                                                     | Caregivers who obtained health information online      | 47-78%     | <ul style="list-style-type: none"> <li>• Information (78%)</li> <li>• Communication (47%)</li> </ul> | <p>Facilitator of information use: Higher parent educational attainment</p> <p>Facilitators of communication with a healthcare provider: Higher parent age, higher parent educational attainment, English household language, and daily email use</p>                                                                                                                                                                                          |
| DeMartini, 2013 [26] | 97%                  | <ul style="list-style-type: none"> <li>• 80% accessed at home</li> <li>• 71% accessed using phone</li> <li>• 91%=Email users</li> <li>• 78%=Facebook users</li> <li>• 55%=Daily users</li> </ul> | Caregivers' health-specific uses of digital technology | 58%        | Information                                                                                          | <ul style="list-style-type: none"> <li>• 15%=Daily user and 58%=weekly user</li> <li>• 6%=Specific search for hospital information</li> <li>• 71%=Used online information approved by medical providers</li> <li>• 53%=Used online information for decision makings about their child's health</li> <li>• Preferred contents: Common infections (77%), developmental activities (73%), healthy eating (71%), regular check-up(65%),</li> </ul> |

|                      |     |                                                                                                                                                                   |                                                                      |     |                                                                                                                                                               |                                                                                                                                                                                                                                                                                                                                                                                                                                                                                                                                                       |
|----------------------|-----|-------------------------------------------------------------------------------------------------------------------------------------------------------------------|----------------------------------------------------------------------|-----|---------------------------------------------------------------------------------------------------------------------------------------------------------------|-------------------------------------------------------------------------------------------------------------------------------------------------------------------------------------------------------------------------------------------------------------------------------------------------------------------------------------------------------------------------------------------------------------------------------------------------------------------------------------------------------------------------------------------------------|
|                      |     |                                                                                                                                                                   |                                                                      |     |                                                                                                                                                               | &regional resources (62%)                                                                                                                                                                                                                                                                                                                                                                                                                                                                                                                             |
| Dudas, 2013 [27]     | 76% | Email users are more likely to have a college or greater education, higher income, and private insurance.                                                         | Caregivers' access to care over the Internet focusing on email use   | 11% | Communication (74%)                                                                                                                                           | <ul style="list-style-type: none"> <li>• 86%=Wanted to email to their doctors</li> <li>• 79%=Agreed that more doctors should offer email communication</li> <li>• 40% wanted to receive lab results via email.</li> <li>• Disparities of race (AA)</li> </ul>                                                                                                                                                                                                                                                                                         |
| Naftel, 2013 [21]    | 92% | <ul style="list-style-type: none"> <li>• 63%= Daily user</li> <li>• 60%=Social media user</li> <li>• Place of access to Internet: Home and smart phone</li> </ul> | e-Caregivers who use the Internet related to their children's health | 82% | <ul style="list-style-type: none"> <li>• Information (82%)</li> <li>• Education (78%)</li> <li>• Support group (29%)</li> <li>•Communication (35%)</li> </ul> | <ul style="list-style-type: none"> <li>• Among e-caregivers: <ul style="list-style-type: none"> <li>- 86%=Helpful in learning about disease</li> <li>- 90%=Interested in doctors' guidance in use of online resources</li> <li>- 58%=Sometimes trusted information</li> <li>- 95%=Accessed social media</li> <li>- 78%=Used educational videos (YouTube)</li> </ul> </li> <li>• Disparities of race (AA), low income, and lower education</li> <li>• No association related to geographic location, age of parents, and status of disease.</li> </ul> |
| Nordfeldt, 2013 [24] | 96% | • 85% at home                                                                                                                                                     | Caregivers who obtained                                              | 52% | <ul style="list-style-type: none"> <li>• Information</li> <li>• Management of stressful life</li> </ul>                                                       | Unspecified Internet sources used for support and information related                                                                                                                                                                                                                                                                                                                                                                                                                                                                                 |

|                       |     |                                                                                                                                                                 |                                                                                         |                 |                                                                                                               |                                                                                                                                                                                                                                                                                                                               |
|-----------------------|-----|-----------------------------------------------------------------------------------------------------------------------------------------------------------------|-----------------------------------------------------------------------------------------|-----------------|---------------------------------------------------------------------------------------------------------------|-------------------------------------------------------------------------------------------------------------------------------------------------------------------------------------------------------------------------------------------------------------------------------------------------------------------------------|
|                       |     |                                                                                                                                                                 | health information and support                                                          |                 | event                                                                                                         | to type 1 diabetes. The use increases trust and suitability of the disease and finally meet parental emotional needs.                                                                                                                                                                                                         |
| AlSaadi, 2012 [20]    | -   | -                                                                                                                                                               | Caregivers who obtained health information                                              | 79%             | • Information                                                                                                 | <ul style="list-style-type: none"> <li>• Reasons for internet use were reassurance, clarification, online consulting, and new management schemes.</li> <li>• Facilitator of information use: Higher parent educational attainment</li> </ul>                                                                                  |
| Fagnano, 2012 [19]    | 73% | <ul style="list-style-type: none"> <li>• 45% at home</li> <li>• 54%=Email account</li> </ul>                                                                    | Caregivers who obtained health information online                                       | 52%<br>-<br>62% | Information                                                                                                   | <ul style="list-style-type: none"> <li>• 90%=Online information was easy to read</li> <li>• 85%=Online information was easy to understand</li> <li>• Facilitator: Adequate health literacy</li> </ul>                                                                                                                         |
| Saidinejad, 2012 [32] | 99% | <ul style="list-style-type: none"> <li>• 62% at home</li> <li>• 70%=Daily users</li> <li>• 96%=Have an email account</li> <li>• 60%=Facebook account</li> </ul> | Caregivers interested in receiving health care-related information via electronic means | -               | <ul style="list-style-type: none"> <li>• Information</li> <li>• Communication</li> <li>• Education</li> </ul> | <ul style="list-style-type: none"> <li>• 93%=Interested in electronic communication from the ED</li> <li>• 34%=Interested in electronic communication channel with primary care providers</li> <li>• 77%=Interested in receiving ED newsletter</li> <li>• 66%=Discharge instruction</li> <li>• 73%=Education about</li> </ul> |

|                      |     |                                                           |                                                                                         |     |                                                                                                                                                                                                      |                                                                                                                                                                                            |
|----------------------|-----|-----------------------------------------------------------|-----------------------------------------------------------------------------------------|-----|------------------------------------------------------------------------------------------------------------------------------------------------------------------------------------------------------|--------------------------------------------------------------------------------------------------------------------------------------------------------------------------------------------|
|                      |     |                                                           |                                                                                         |     |                                                                                                                                                                                                      | <p>common illness</p> <ul style="list-style-type: none"> <li>• Disparities of ethnicity (Hispanic)</li> </ul>                                                                              |
| Walsh, 2012 [29]     | –   | Mean hours to use Internet per week=26.32 hours           | Caregivers using online health information for their child's health care                | –   | Information                                                                                                                                                                                          | Facilitator: Strong intention to understand child health information                                                                                                                       |
| Knapp, 2011 [28]     | 82% | 49%=Daily user                                            | Caregivers knowing how to find health-related information via online for their children | 74% | Information                                                                                                                                                                                          | <ul style="list-style-type: none"> <li>• 50%=Felt confident in finding high quality information online</li> <li>• Disparities of race (AA) and non-English speaking populations</li> </ul> |
| Gundersen, 2011 [22] | –   | –                                                         | Caregivers using Internet to help their children                                        | –   | <ul style="list-style-type: none"> <li>• Information</li> <li>• Coping with their emotions</li> <li>• Management of stressful life event</li> <li>• Reestablishment of sense of coherence</li> </ul> | Facilitator: Unmanageable situations beyond parental adjustment                                                                                                                            |
| Nogueira, 2009 [23]  | 98% | Common generic search engines=Google (79%), others (18%), | Caregivers using Internet for health-related                                            | 90% | Information                                                                                                                                                                                          | 10%=Discussed the web-based information with their physician during onsite clinic visit                                                                                                    |

|                    |     |                                                                                                                                      |                                                                                                 |          |                                                                                                                                                |                                                                                                                                                                                                                                                                                                                                                                                                                                                                                              |
|--------------------|-----|--------------------------------------------------------------------------------------------------------------------------------------|-------------------------------------------------------------------------------------------------|----------|------------------------------------------------------------------------------------------------------------------------------------------------|----------------------------------------------------------------------------------------------------------------------------------------------------------------------------------------------------------------------------------------------------------------------------------------------------------------------------------------------------------------------------------------------------------------------------------------------------------------------------------------------|
|                    |     | and Yahoo (3%)                                                                                                                       | informatio<br>n                                                                                 |          |                                                                                                                                                |                                                                                                                                                                                                                                                                                                                                                                                                                                                                                              |
| Bouche, 2008 [25]  | –   | –                                                                                                                                    | Caregivers using Internet for health-related informatio<br>n                                    | 52%      | Information                                                                                                                                    | <ul style="list-style-type: none"> <li>• Internet is the most commonly used health information source.</li> <li>• No association between health-related Internet use and the number of consultations with primary care providers.</li> </ul>                                                                                                                                                                                                                                                 |
| Porter, 2007 [17]  | 67% | 67%<br>=Comfortable using the Internet                                                                                               | Caregivers using Internet for health-related informatio<br>n, support, and healthcare education | 44 - 87% | <ul style="list-style-type: none"> <li>• Information (87%)</li> <li>• Emotional and social support (55%)</li> <li>• Education (44%)</li> </ul> | <ul style="list-style-type: none"> <li>• 87%=Used a generic search engine</li> <li>• 44%=Used specialized medical websites</li> <li>• 11%=Used websites recommended by family and friends</li> <li>• 52%=Discussed the web-based information with their physician during onsite clinic visit</li> <li>• 58%=Their doctors were interested in the web-based information</li> <li>• Facilitator: Higher levels of education</li> <li>• No age effect on health-related Internet use</li> </ul> |
| Goldman, 2006 [31] | 87% | <ul style="list-style-type: none"> <li>• 15% in a library, Internet café, or other public place</li> <li>• 75%=Email user</li> </ul> | Caregivers using Internet for their children's health conditions                                | 56%      | Information                                                                                                                                    | <ul style="list-style-type: none"> <li>• 8.5%=health-related Internet use before onsite clinic visits</li> <li>• Few remembered the specific websites informal caregivers used.</li> </ul>                                                                                                                                                                                                                                                                                                   |

|                      |     |                                                                                                                                            |                                                          |                 |                                                                                                                                     |                                                                                                                                                                                                                                                                                                                                                                                                                                                                                                                                                                           |
|----------------------|-----|--------------------------------------------------------------------------------------------------------------------------------------------|----------------------------------------------------------|-----------------|-------------------------------------------------------------------------------------------------------------------------------------|---------------------------------------------------------------------------------------------------------------------------------------------------------------------------------------------------------------------------------------------------------------------------------------------------------------------------------------------------------------------------------------------------------------------------------------------------------------------------------------------------------------------------------------------------------------------------|
|                      |     | <ul style="list-style-type: none"> <li>• 60%=Daily email user</li> </ul>                                                                   |                                                          |                 |                                                                                                                                     | <ul style="list-style-type: none"> <li>• 80% of parents used and wanted to receive results electronically.</li> <li>• 95%=Internet was very helpful in understanding their child's illness</li> <li>• 94%=Cannot find online information</li> </ul>                                                                                                                                                                                                                                                                                                                       |
| Massin, 2006 [18]    | 62% | <ul style="list-style-type: none"> <li>• 74% at home</li> <li>• 33% at work</li> <li>• 4% at school</li> <li>• 3% at cyber cafe</li> </ul> | Caregivers using Internet for health-related information | 15%<br>-<br>35% | Information                                                                                                                         | <ul style="list-style-type: none"> <li>• 35%=health-related Internet use at the time of diagnosis</li> <li>• Facilitator: Care-recipient's specific treatment need</li> </ul>                                                                                                                                                                                                                                                                                                                                                                                             |
| Blackburn, 2005 [33] | 75% | <ul style="list-style-type: none"> <li>• 83% at home</li> <li>• 28% access using phone</li> </ul>                                          | Caregivers using Internet related to caring              | 72%             | <ul style="list-style-type: none"> <li>• Information (72%)</li> <li>• Contact with organizations related to health (36%)</li> </ul> | <ul style="list-style-type: none"> <li>• Technical problems: <ul style="list-style-type: none"> <li>- Longer time to find the information (86%)</li> <li>- Unsuccessful searches (85%)</li> <li>- Websites were difficult to navigate (79%)</li> <li>- Too slow Internet connection (73%)</li> <li>- Difficult to understand (60%)</li> <li>- Difficult to use software (57%)</li> </ul> </li> <li>• Circumstantial barriers: <ul style="list-style-type: none"> <li>- Lack of time due to demands of care (57%) or due to other commitments (61%)</li> </ul> </li> </ul> |

|  |  |  |  |  |  |                                                                                                                                                       |
|--|--|--|--|--|--|-------------------------------------------------------------------------------------------------------------------------------------------------------|
|  |  |  |  |  |  | <ul style="list-style-type: none"> <li>- Cost of internet (22%)</li> <li>- Costs of equipment (15%)</li> <li>- Fear about technology (13%)</li> </ul> |
|--|--|--|--|--|--|-------------------------------------------------------------------------------------------------------------------------------------------------------|

Notes for Abbreviations: ED=Emergent department; AA=African American
