# Supplementary material for: Health-Related Internet Use by Informal Caregivers of Children and Adolescents: An Integrative Literature Review
Source: PubMed Central journal article supplement (PMC4796403; doi:10.2196/jmir.4124), 2016-03-03
Supplement: jmir_v18i3e57_app3.pdf [file jmir_v18i3e57_app3.pdf]

Table 3. Methodological Evaluation of Study Quality

| First Author, Year   | Research design                                           | Conceptual framework | Sampling                                   | Data collection method and instrument                                                                      | Analysis method                                                           | Threats to validity                                                                                                                                   |
|----------------------|-----------------------------------------------------------|----------------------|--------------------------------------------|------------------------------------------------------------------------------------------------------------|---------------------------------------------------------------------------|-------------------------------------------------------------------------------------------------------------------------------------------------------|
| Zuckerman, 2014 [30] | Quantitative; Cross-sectional; Correlational; Prospective | ○ None               | ● Convenience sampling in a single site    | ○ Onsite survey using investigator-developed questionnaires                                                | ● Descriptive frequency statistics; logistic regression                   | ● Self-report and self-selection bias; limited generalizability for non-English speakers                                                              |
| DeMartini, 2013 [26] | Quantitative; Cross-sectional; Descriptive; Prospective   | ○ None               | ● Convenience sampling from multiple sites | ○ Onsite survey using investigator-developed questionnaires and 4-point Likert scale of digital technology | ● Descriptive frequency statistics; Univariate analysis (Chi-square test) | ● Self-report and self-selection bias; heterogeneity between two sites                                                                                |
| Dudas, 2013 [27]     | Quantitative; Cross-sectional; Correlational; Prospective | ○ None               | ● Convenience sampling in a single site    | ○ Onsite survey using investigator-developed questionnaires                                                | ● Descriptive frequency statistics; logistic regression                   | ● Self-report and self-selection bias; questionable reliability between self- and clinician-report; limited generalizability for non-English speaking |
| Naftel, 2013 [21]    | Quantitative; Cross-sectional; Descriptive; Prospective   | ○ None               | ● Convenience sampling from multiple sites | ○ Onsite survey using investigator-developed questionnaires                                                | ● Descriptive frequency statistics; Univariate analyses (Chi-             | ● Self-report and self-selection bias; limited generalizability for non-English speakers                                                              |

|                       |                                                                     |                              |                                                        |                                                                                                                                                 |                                                                                                     |                                                                                                                                              |
|-----------------------|---------------------------------------------------------------------|------------------------------|--------------------------------------------------------|-------------------------------------------------------------------------------------------------------------------------------------------------|-----------------------------------------------------------------------------------------------------|----------------------------------------------------------------------------------------------------------------------------------------------|
| Nordfeldt, 2013 [24]  | Qualitative; Cross-sectional; Descriptive ; Prospective             | ○ None                       | ● Purposive sampling based on the child age and gender | Structured focus group discussion                                                                                                               | Inductive qualitative content analysis                                                              | ● Self-report and self-selection bias                                                                                                        |
| AlSaadi, 2012 [20]    | Quantitative; Cross-sectional; Correlational; Prospective           | ○ None                       | ● Random sampling from multiple sites                  | ○ Onsite survey using investigator-developed questionnaires                                                                                     | ● Descriptive frequency statistics; logistic regression                                             | ● Self-report and self-selection bias; limited generalizability outside of Saudi Arabian                                                     |
| Fagnano, 2012 [19]    | Quantitative; Cross-sectional; Correlational; Prospective           | ○ None                       | ● Convenience sampling from a clinical trial           | ● Onsite survey using a modified Health Information National Trends Survey questionnaire [35]                                                   | ● Descriptive frequency statistics; logistic regression                                             | ● Self-report and self-selection bias; limited generalizability due to limited recruitment method                                            |
| Saidinejad, 2012 [32] | Quantitative; Cross-sectional; Correlational; Prospective           | ○ None                       | ● Convenience sampling in a single site                | ● Onsite survey using a modified Pew and the American Life study of consumers' use of the Internet for healthcare information questionnaire[31] | ● Descriptive frequency statistics; univariate analyses (Chi-square & t tests); logistic regression | ● Self-report and self-selection bias; limited generalizability for non-English speakers; overpowering with large sample size (type 1 error) |
| Walsh, 2012 [29]      | Quantitative; Cross-sectional with multiple measures; Correlational | ● Theory of planned behavior | ● Convenience sampling through online approach         | ● Telephone survey using investigator-developed questionnaire                                                                                   | ● Descriptive frequency statistics; univariate analysis                                             | ● Self-report and self-selection bias; high drop-out rate (52%); limited                                                                     |

|                         |                                                                   |                                                          |                                                               |                                                                                           |                                                                             |                                                                                                                    |
|-------------------------|-------------------------------------------------------------------|----------------------------------------------------------|---------------------------------------------------------------|-------------------------------------------------------------------------------------------|-----------------------------------------------------------------------------|--------------------------------------------------------------------------------------------------------------------|
|                         | al;<br>Prospective                                                |                                                          |                                                               | res<br>(psychometric<br>information<br>reported)                                          | (Pearson r<br>test),<br>MANOVA<br>;<br>hierarchical<br>linear<br>regression | generalizability for non-<br>Internet<br>users                                                                     |
| Knapp,<br>2011 [28]     | Quantitative; Cross-sectional;<br>Correlational;<br>Prospective   | ○ None                                                   | ● Random sampling in a medical services network program       | ○ Telephone survey using investigator-developed questionnaires and eHealth Literacy Scale | ● Descriptive frequency statistics; logistic regression                     | ● Self-report and self-selection bias; low response rate (58%); overpowering with large sample size (type 1 error) |
| Gundersen,<br>2011 [22] | Qualitative; Cross-sectional;<br>Descriptive<br>;<br>Prospective  | ● Antonovsky's concepts of sense of coping and coherence | ● Convenience and purposive sampling                          | ○ Unstructured in-depth interview                                                         | ● Content analysis                                                          | ○ Self-report and self-selection bias; questionable validity and reliability from one rater and coder              |
| Nogueira,<br>2009 [23]  | Quantitative; Cross-sectional;<br>Descriptive<br>;<br>Prospective | ○ None                                                   | ● Convenience sampling in a single site                       | ○ Onsite survey using investigator-developed questionnaires                               | ○ Descriptive frequency statistics                                          | ● Self-report and self-selection bias; limited generalizability for non-English speakers                           |
| Bouche,<br>2008 [25]    | Quantitative; Cross-sectional;<br>Correlational;<br>Prospective   | ○ None                                                   | ● Stratified sampling (type and location) from multiple sites | ○ Postal survey using investigator-developed questionnaires                               | ● Descriptive frequency statistics; logistic regression                     | ● Self-report bias; low response rate (49%)                                                                        |
| Porter, 2007<br>[17]    | Mixed methods; Cross-sectional;<br>Descriptive                    | ○ None                                                   | ● Convenience sampling from multiple                          | ○ Online survey using investigator                                                        | ● Descriptive frequency statistics;                                         | ● Self-report and self-selection bias; unclear eligibility of                                                      |

|                      |                                                           |        |                                                                   |                                                                                  |                                                                                                |                                                                                                                                                                                |                                                                                                                         |
|----------------------|-----------------------------------------------------------|--------|-------------------------------------------------------------------|----------------------------------------------------------------------------------|------------------------------------------------------------------------------------------------|--------------------------------------------------------------------------------------------------------------------------------------------------------------------------------|-------------------------------------------------------------------------------------------------------------------------|
|                      |                                                           |        |                                                                   | sites                                                                            | -developed questionnaires (reliability tested)                                                 | univariate analysis (Chi-square test); content analysis                                                                                                                        | study participants; limited generalizability for non-Internet users and non-English speakers; heterogeneous study sites |
| Goldman, 2006 [31]   | Quantitative; Cross-sectional; Descriptive; Prospective   | ○ None | ● Convenience sampling in a single site (stratified by visit day) | ○ Onsite survey using investigator-developed questionnaires (reliability tested) | ● Descriptive frequency statistics; univariate analyses (Chi-square & t test)                  | ○ Self-report and self-selection bias; overpowering with large sample size (type 1 error); heterogeneous study participants; limited generalizability for non-English speakers |                                                                                                                         |
| Massin, 2006 [18]    | Quantitative; Cross-sectional; Correlational; Prospective | ○ None | ● Convenience sampling in a single site                           | ○ Postal survey using investigator-developed questionnaires                      | ○ Descriptive frequency statistics; univariate analysis (Chi-square test); logistic regression | ○ Self-report and self-selection bias; overpowering with large sample size (type 1 error)                                                                                      |                                                                                                                         |
| Blackburn, 2005 [33] | Quantitative; Cross-sectional; Descriptive; Prospective   | ○ None | ● Systematic sampling from the Carers UK database                 | ○ Postal survey using investigator-developed questionnaires                      | ● Descriptive frequency statistics; univariate analysis                                        | ● Self-report bias; low response rate (40%); heterogeneous primary data sources;                                                                                               |                                                                                                                         |

---

|                                |                          |                                                                 |
|--------------------------------|--------------------------|-----------------------------------------------------------------|
| res<br>(reliability<br>tested) | (Chi-<br>square<br>test) | overpowerin<br>g with large<br>sample size<br>(type 1<br>error) |
|--------------------------------|--------------------------|-----------------------------------------------------------------|

---

Notes: Based on the guidelines of the Agency for Healthcare Research and Quality criteria [16];  
●=Fully met the criteria; ◐=Partially met the criteria; and ○=Not met the criteria.
