# Supplementary material for: Health-Related Internet Use by Informal Caregivers of Children and Adolescents: An Integrative Literature Review
Source: PubMed Central journal article supplement (PMC4796403; doi:10.2196/jmir.4124), 2016-03-03
Supplement: jmir_v18i3e57_app4.pdf [file jmir_v18i3e57_app4.pdf]

Table 4. Modified Guideline of Agency for Healthcare Research and Quality Criteria

|                                       | Criteria                                                                                                                                                                                                                                                                         |
|---------------------------------------|----------------------------------------------------------------------------------------------------------------------------------------------------------------------------------------------------------------------------------------------------------------------------------|
| Conceptual framework                  | <ul style="list-style-type: none"> <li>• Appropriate use of conceptual framework</li> </ul> <p>Clear definition of concept(s)</p>                                                                                                                                                |
| Sampling                              | <ul style="list-style-type: none"> <li>• Description of study populations</li> <li>• Sample size justification</li> <li>• Specific inclusion/ exclusion criteria for all groups</li> </ul> <p>Study groups comparable to non-participants with regard to confounding factors</p> |
| Data collection method and instrument | <ul style="list-style-type: none"> <li>• Outcome measures of precision</li> </ul> <p>Measurement method standard, valid, and reliable</p>                                                                                                                                        |
| Data analysis                         | <ul style="list-style-type: none"> <li>• Appropriateness of statistical models</li> <li>• Adequacy of description and reporting of statistical analysis</li> </ul> <p>Extent to which all analysis that should have been done were done</p>                                      |
| Threats to validity                   | <ul style="list-style-type: none"> <li>• Threats to internal validity – Degree to which the study provides valid evidence for the population and setting</li> <li>• Threats to external validity – Extent to which the evidence is generalizable to the population</li> </ul>    |
